# Supplementary material
Source: publisher site journal article supplement (https://www.dovepress.com/article/487370)
Supplement: Supplementary file 1 [file get_supplementary_file.php]

**Supplementary Material**

**Supplementary Tables**

Table S1. Demographic and clinical characteristics of patients in each cohort

| Parameters | Total (n=203) | Training cohort (n=100) | Validation cohort (n=103) | *P*-value |
| --- | --- | --- | --- | --- |
| **Gender** |  |  |  | 0.448 |
| Male | 177(87.2%) | 89(89.0%) | 88(85.4%) |  |
| Female | 26(12.8%) | 11(11.0%) | 15(14.6%) |  |
| **Age**† | 51.9(11.3) | 50.8(10.7) | 52.9(11.8) | 0.099 |
| **HBV/HCV infection** |  |  |  | 0.052 |
| Negative | 27(13.3%) | 18(18.0%) | 9(8.7%) |  |
| Positive | 176(86.7%) | 82(82.0%) | 94(91.3%) |  |
| **AFP (ng/ml)** |  |  |  | 0.368 |
| ≤ 200 | 140(69.0%) | 66(66.0%) | 74(71.8%) |  |
| > 200 | 63(31.0%) | 34(34.0%) | 29(28.2%) |  |
| **ALT (U/L)** |  |  |  | 0.633 |
| ≤50 | 170(83.7%) | 85(85.0%) | 85(82.5%) |  |
| >50 | 33(16.3%) | 15(15.0%) | 18(17.5%) |  |
| **AST (U/L)** |  |  |  | 0.656 |
| ≤40 | 137(67.5%) | 66(66.0%) | 71(68.9%) |  |
| >40 | 66(32.5%) | 34(34.0%) | 32(31.1%) |  |
| **GGT (U/L)** |  |  |  | 0.185 |
| ≤60 | 74(36.5%) | 41(41.0%) | 33(32.0%) |  |
| >60 | 129(63.5%) | 59(59.0%) | 70(68.0%) |  |
| **ALB(g/L)** |  |  |  | <0.001 |
| ≤35 | 45(22.2%) | 39(39.0%) | 6(5.8%) |  |
| >35 | 158(77.8%) | 61(61.0%) | 97(94.2%) |  |
| **TBIL (mg/dl)** |  |  |  | 0.203 |
| ≤17.1 | 173(85.2%) | 82(82.0%) | 91(88.3%) |  |
| >17.1 | 30(14.8%) | 18(18.0%) | 12(11.7%) |  |
| **PT (s)** |  |  |  | 0.003 |
| ≤13 | 180(88.7%) | 82(82.0%) | 98(95.1%) |  |
| >13 | 23(11.3%) | 18(18.0%) | 5(4.9%) |  |
| **Child-Pugh** |  |  |  | 0.207 |
| A | 198(97.5%) | 96(96.0%) | 102(99.0%) |  |
| B | 5(2.5%) | 4(4.0%) | 1(1.0%) |  |
| **Tumor number** |  |  |  | 0.188 |
| Single | 117(57.6%) | 53(53.0%) | 64(62.1%) |  |
| Multiple | 86(42.4%) | 47(47.0%) | 39(37.9%) |  |
| **Largest diameter of tumor (cm)**‡ | 6.5 (4.8,9.1) | 7.5 (5.6,9.5) | 5.8 (4.5,8.7) | 0.002 |
| **BCLC stage** |  |  |  | 0.275 |
| A | 91(44.8%) | 41(41.0%) | 50(48.5%) |  |
| B | 61(30.0%) | 29(29.0%) | 32(31.1%) |  |
| C | 51(25.1%) | 30(30.0%) | 21(20.4%) |  |
| **Vascular invasion** |  |  |  | 0.017 |
| Negative | 162(79.8%) | 73(73.0%) | 89(86.4%) |  |
| Positive | 41(20.2%) | 27(27.0%) | 14(13.6%) |  |
| **MVI** |  |  |  | 0.238 |
| Negative | 177(87.2%) | 90(90.0%) | 87(84.5%) |  |
| Positive | 26(12.8%) | 10(10.0%) | 16(15.5%) |  |
| **Neoadjuvant conversion therapy strategy** |  |  |  | <0.001 |
| TACE | 38(18.7%) | 23(23.0%) | 15(14.6%) |  |
| HAIC | 57(28.1%) | 1(1.0%) | 56(54.4%) |  |
| TACE+HAIC | 20(9.9%) | 9(9.0%) | 11(10.7%) |  |
| TACE+HAIC+  TKIs/ICIs | 42(20.7%) | 31(31.0%) | 11(10.7%) |  |
| TACE+TKIs/ICIs | 22(10.8%) | 22(22.0%) | 0(0.0%) |  |
| HAIC+TKIs/ICIs | 14(6.9%) | 4(4.0%) | 10(9.7%) |  |
| Others | 10(4.9%) | 10(10.0%) | 0(0.0%) |  |
| **CR evaluation**  **by mRECIST** |  |  |  | 0.052 |
| No | 176(86.7%) | 82(82.0%) | 94(91.3%) |  |
| Yes | 27(13.3%) | 18(18.0%) | 9(8.7%) |  |
| **Pathological complete response** |  |  |  | 0.070 |
| No | 159(78.3%) | 73(73.0%) | 86(83.5%) |  |
| Yes | 44(21.7%) | 27(27.0%) | 17(16.5%) |  |

Values in parentheses are percentages unless indicated otherwise; †values are mean (SD), ‡values are median (i.q.r.). HBV/HCV, hepatitis B/C virus; AFP, alpha-fetoprotein; ALT, alanine aminotransferase; AST, aspartate aminotransferase; GGT, γ-gltamyl transferase; ALB, albumin; TBIL, total bilirubin; PT, prothrombin time; BCLC, Barcelona Clinic Liver Cancer System; MVI, microvascular invasion; TACE, transarterial chemoembolization; HAIC, hepatic arterial infusion chemotherapy; TKIs, tyrosine kinase inhibitors; ICIs, immune checkpoint inhibitors; CR, complete response; mRECIST, modified Response Evaluation Criteria in Solid Tumors.

Table S2. The summary of the 396 radiomic features.

| Feature subgroups | Number | Representative 3-4 feature details |
| --- | --- | --- |
| Histogram parameters | 42 | Frequency Size, Range, Percentile, Quantile |
| Texture parameters | 54 | Cluster Prominence, Cluster Shade, Correlation |
| GLCM | 100 | GLCM Energy, GLCM Entropy, Haralick Correlation, Inverse Difference Moment |
| RLM | 180 | Grey Level Non uniformity, High Grey Level Run Emphasis, Low Grey Level Run Emphasis, Long Run Emphasis |
| Form factors | 9 | Compactness, Sphericity, Surface Area, Surface Volume Ratio |
| GLSZM | 11 | Size Zone Variability, High Intensity Emphasis, Large Area Emphasis, Zone Percentage |
| Total | 396 |  |

GLCM, gray level co-occurrence matrix; RLM, run-length matri; GLSZM, gray level size-zone matrix.

Table S3. 10 radiomic features for radiomics model construction.

| CT phase | Feature  Label | Details of important radiomic features | Feature subgroup | Coefficient |
| --- | --- | --- | --- | --- |
| Arterial | A308 | RunLengthNonuniformity_AllDirection_offset4_SD | RLM | 0.311 |
| Arterial | A274 | LongRunLowGreyLevelEmphasis_AllDirection_offset7_SD | RLM | -0.467 |
| Arterial | A66 | ClusterShade_AllDirection_offset7_SD | Texture | -1.989 |
| Arterial | A247 | LongRunEmphasis_angle45_offset7 | RLM | -0.181 |
| Portal vein | P241 | LongRunEmphasis_angle0_offset7 | RLM | -0.352 |
| Portal vein | P389 | HighIntensitySmallAreaEmphasis | GLSZM | -0.448 |
| Portal vein | P214 | GreyLevelNonuniformity_angle90_offset7 | RLM | -0.192 |
| Portal vein | P131 | GLCMEntropy_angle90_offset4 | GLCM | 0.428 |
| Portal vein | P36 | VoxelValueSum | Histogram | -0.206 |
| Portal vein | P62 | ClusterShade_AllDirection_offset1_SD | Texture | 1.457 |

RLM, run-length matrix; GLSZM, gray level size-zone matrix; GLCM, gray level co-occurrence matrix.

Table S4. 10 radiomic features for SMOTE-radiomics model construction.

| CT phase | Feature  Label | Details of important radiomic features | Feature subgroup | Coefficient |
| --- | --- | --- | --- | --- |
| Arterial | A60 | ClusterProminence_angle90_offset7 | Texture | -1.882 |
| Arterial | A220 | HighGreyLevelRunEmphasis_AllDirection_offset7_SD | RLM | 0.459 |
| Arterial | A44 | ClusterProminence_AllDirection_offset1_SD | Texture | -3.162 |
| Arterial | A358 | ShortRunHighGreyLevelEmphasis_angle90_offset7 | RLM | 0.905 |
| Portal vein | P62 | ClusterShade_AllDirection_offset1_SD | Texture | 5.740 |
| Portal vein | P66 | ClusterShade_AllDirection_offset7_SD | Texture | -2.856 |
| Portal vein | P44 | ClusterProminence_AllDirection_offset1_SD | Texture | 0.545 |
| Portal vein | P120 | GLCMEntropy_AllDirection_offset7_SD | GLCM | 0.780 |
| Portal vein | P248 | LongRunEmphasis_angle90_offset1 | RLM | -0.462 |
| Portal vein | P389 | HighIntensitySmallAreaEmphasis | GLSZM | -1.302 |

RLM, run-length matrix; GLSZM, gray level size-zone matrix; GLCM, gray level co-occurrence matrix.


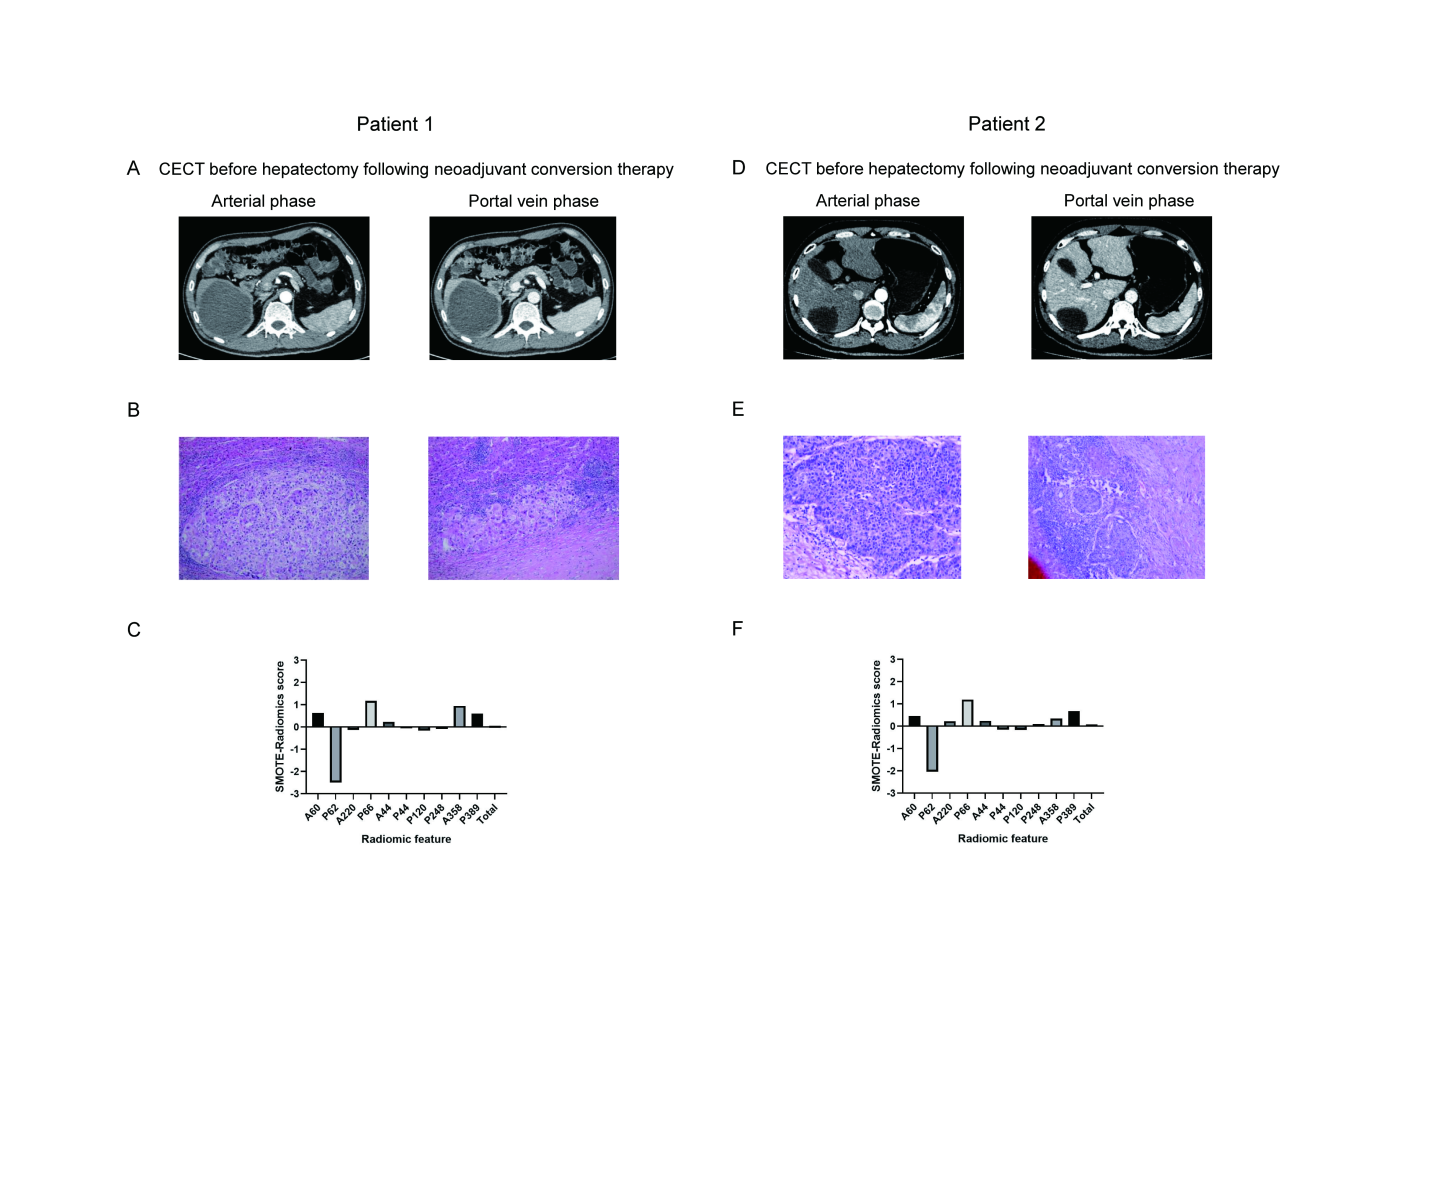


Figure S1. Two representative patients, preoperative CECT indicated CR, SMOTE-

radiomic model predicted non-pCR, postoperative pathology confirmed non-pCR. (A) and (D) CECT image before hepatectomy following neoadjuvant conversion therapy. (B) and (E) Photomicrographs showed the appearance of surviving tumor cells (Hematoxylin-eosin stain; original magnification, ×100). (C) and (F) Showed the specific score of each radiomics feature of the constructed SMOTE-radiomic model and total score (Patient 1, 0.0454; Patient 2, 0.0891; Cut-off value 0.2109). Two patients were predicted non-pCR. CECT, contrast-enhanced computed tomograph; SMOTE, synthetic minority oversampling technique; CR, complete response; pCR, pathological complete response.


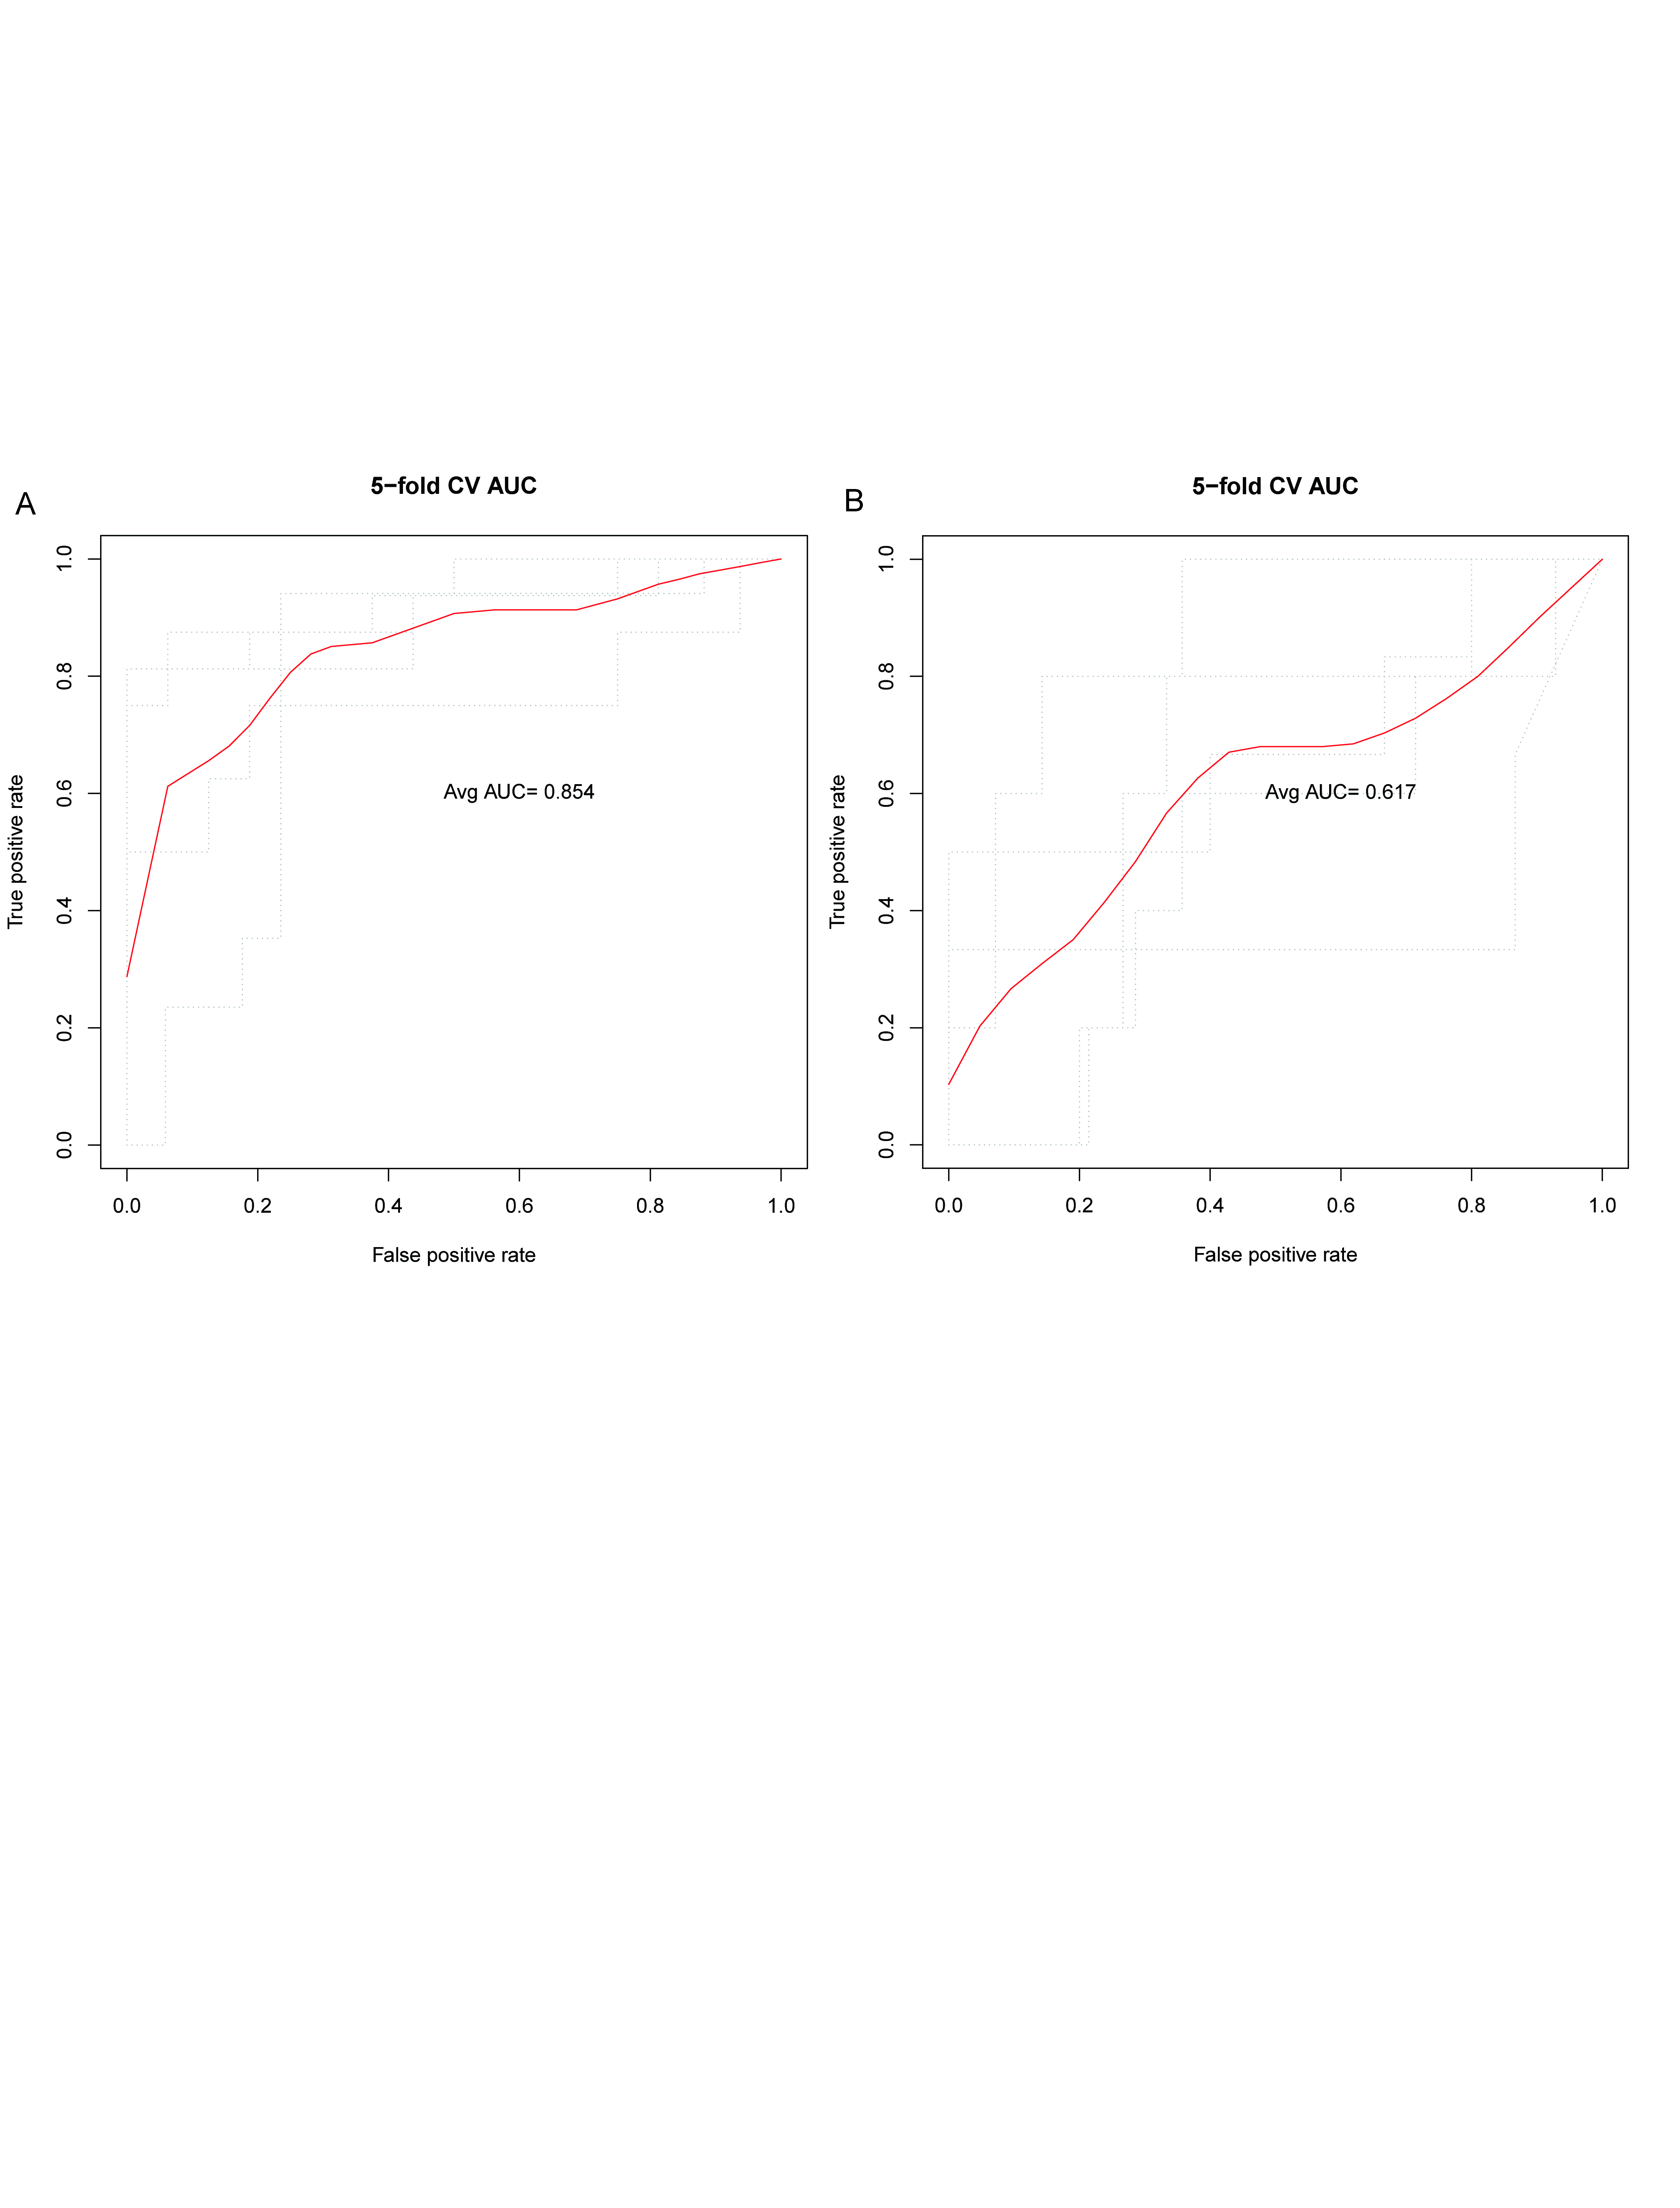


Figure S2. 5-fold cross-validation of SMOTE-radiomics model in the SMOTE-training set (A) and 5-fold cross-validation of radiomics model in the original training set (B). CV, cross-validation; AUC, area under the curve; SMOTE, synthetic minority over-sampling technique.


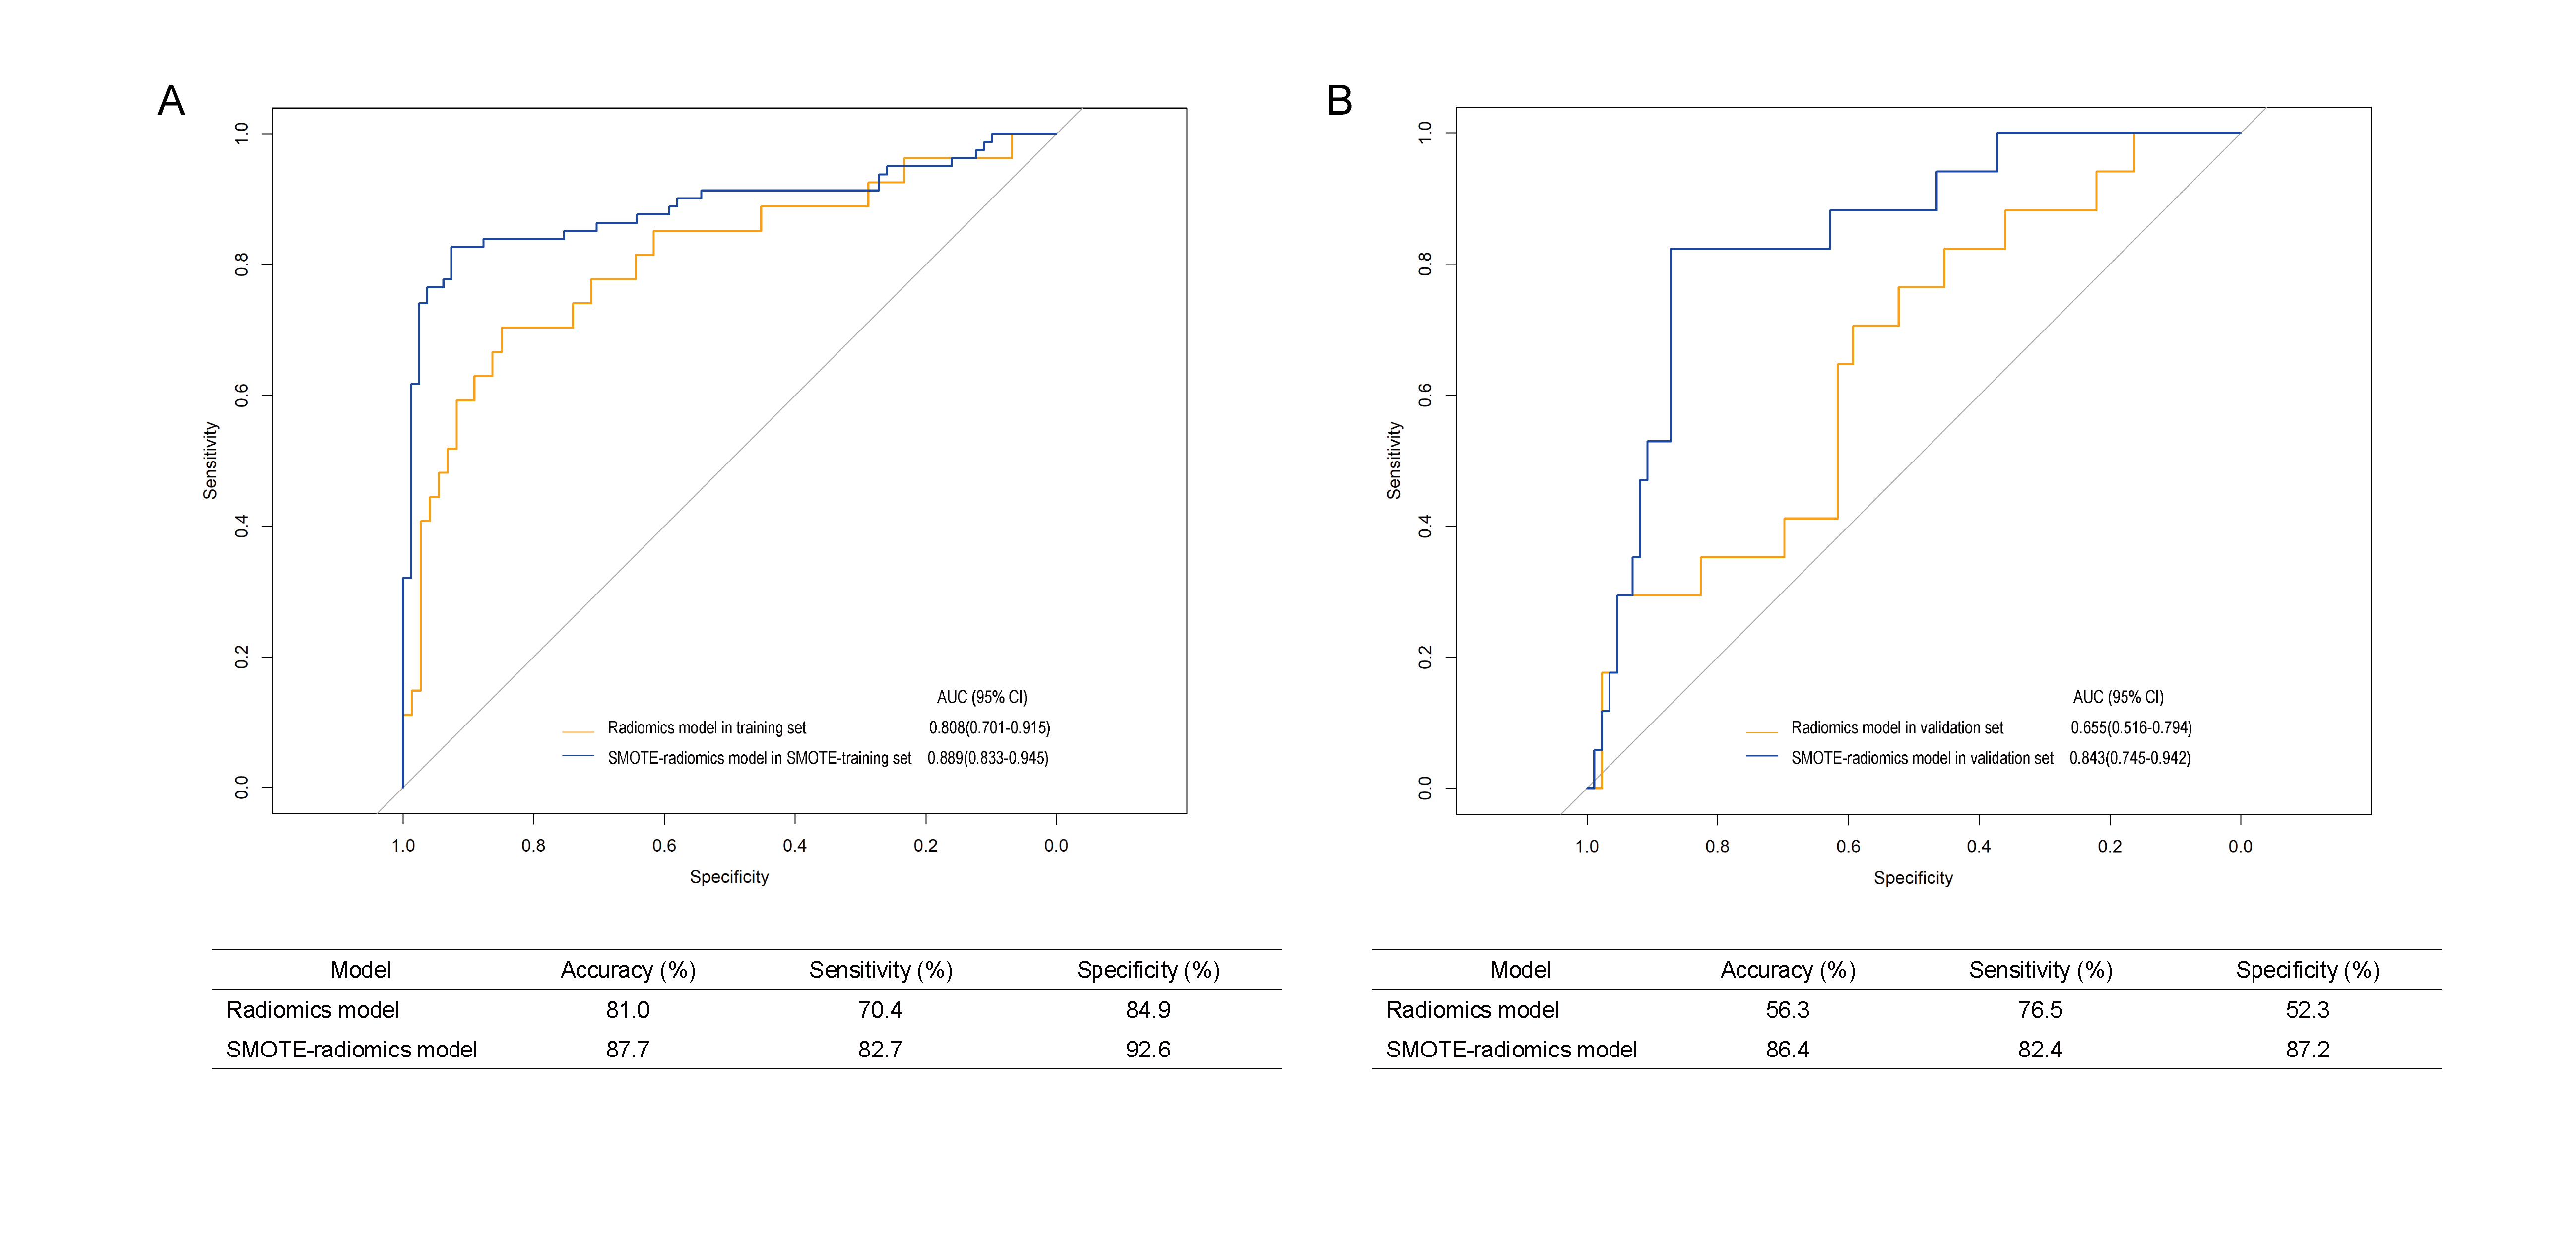


Figure S3. pCR predicted performance of radiomics model and SMOTE-radiomics model. (A) The ROC curves of radiomics and SMOTE-radiomics models in the training set and the SMOTE-training set respectively (AUC: 0.808, 0.889, respectively, P = 0.200). (B) The ROC curves of radiomics and SMOTE-radiomics model in validation set (AUC: 0.655, 0.843, respectively, P = 0.002). AUC, area under the curve; SMOTE, synthetic minority over-sampling technique; pCR, pathological complete response; ROC, receiver operating curve.

**Supplementary Methods**

**Data collection**

The following baseline clinical features were collected through the hospital electronic information system: age, gender, hepatitis, alanine aminotransferase (ALT), aspartate aminotransferase (AST), albumin (ALB), total bilirubin (TB), prothrombin time (PT), γ-Gltamyl transferase (γ-GGT), alpha-fetoprotein (AFP), Barcelona Clinic Liver Cancer (BCLC) stage, the Child-Pugh score, tumor number, largest diameter of tumor, vascular invasion, microvascular invasion (MVI) and conversion therapy strategy. The efficacy of neoadjuvant conversion therapy was evaluated by mRECIST criteria.

**Clinical assessments**

Imaging (CECT or MRI) and hematological tests were performed before each neoadjuvant conversion therapy. The neoadjuvant conversion therapy program was adjusted according to the actual situation in the context of multidisciplinary treatment. CECT or MRI examinations were performed every 2 months after within 1 year after hepatectomy, and reviewed every 3-4 months thereafter. mRECIST was used for tumor assessment.

**Neoadjuvant conversion therapy protocols**

**TACE**

TACE was performed by interventional radiologists with 8 years of relevant experience. With a comprehensive assessment of the hepatic artery blood supply, a catheter was selectively introduced into the segmentary artery supplying the tumor. A mixture of lipiodol (5-30 ml) and chemotherapy drugs was injected. Carboplatin (200-300 mg), cisplatin (10-120 mg), mitomycin C (8 mg), epirubicin (10-50 mg) or oxaliplatin (100-200 mg) were selected as chemotherapy agents according to the actual situation. Subsequently, polyvinyl alcohol particles or gelatine sponge were used to selectively embolized the tumor supplying blood vessels, and vascular embolization was assessed according to angiography.

**HAIC**

HAIC is performed by interventional radiologists or interventional oncologists with more than 8 years of relevant experience using digital subtraction angiography equipment. First, the arterial sheath catheter was inserted into the femoral artery. The 5-Fr Yashiro catheter (Terumo, Tokyo, Japan) was placed in the celiac trunk and the superior mesenteric artery to assess the supplying hepatic artery. A 2.7-fr microcatheter (Terumo, Tokyo, Japan) was inserted into the supplying artery. The peripheral end of the microcatheter was locked with a heparin lock to prevent the catheter from clotting. The exposed part of the catheter was covered with sterile medical gauze and secured to the skin of the thigh with medical tape and bandages. FOLFOX6 was the main chemotherapy regimen, including oxaliplatin (130 mg/m2 infusion for 3 h on day 1), leucovorin (200 mg/m2 for 3-5 hours on day 1), and Fluorouracil (400 mg/m2 in bolus, and then 2400 mg/m2 continuous infusion 46 h), which were given by hepatic arterial infusion through the micro-catheter.

**TKI and ICI therapy**

Some patients in this study received a variety of TKIs, including lenvatinib (8 mg/day) and sorafenib (800 mg/day). The anti-PD-1 antibodies used in this study included tislelizumab (200 mg Q3w), pembrolizumab (200 mg Q3w), camrelizumab (200 mg Q2w), and toripalimab (240 mg Q3w). lenvatinib is the preferred TKI. Anti-PD-1 antibody selection was based on factors such as drug efficacy, safety data, treatment cycle, economic cost, and individual patient choice. The most commonly used was Tislelizumab. In order to manage adverse events during treatment, it was permissible to modify the dose or discontinue use of the drug. For patients with hepatitis B virus infection, antiviral drugs were used continuously throughout the course of anti-cancer treatment. Systemic therapy was interrupted in the presence of tumor progression, unacceptable toxicity or hepatectomy.

**Indication and procedures of hepatectomy**

The criteria for evaluating feasible hepatectomy after conversion therapy were as follow: (1) Intrahepatic tumor lesions lasting at least 2 months were evaluated as partial response (PR) or stable disease (SD). (2) Technically resectable extra-hepatic lesions and thrombus. (3) Residual liver volume after R0 resection was sufficient (residual liver volume ≥ 40% of standard liver volume in patients with cirrhosis and ≥ 30% of standard liver volume in patients without liver cirrhosis).(4) No serious adverse events occurred during conversion therapy. (5) No contraindications for hepatectomy.

TKIs should be discontinued for at least 1 week and anti-PD-1 antibodies should be discontinued for at least 3 weeks before hepatectomy. At 4 weeks after surgery, TKIs and anti-PD-1 antibodies continued to be used according to the preoperative protocol. Radiological evaluation was performed every 2 months in the first year after hepatectomy and every 3-4 months in the second year. If no evidence of tumor recurrence was found, TKIs or anti-PD-1 antibodies were discontinued about 10 months after surgery. When tumor recurrence was diagnosed, according to the actual situation to develop follow-up treatment plan.
